# Supplementary material for: Green self-activation engineering of metal–organic framework derived hollow nitrogen-doped carbon spheres towards supercapacitors
Source: Royal Society of Chemistry journal article supplement (doi:10.1039/d1ta10356c), 2021-12-20
Supplement: d1ta10356c1.pdf [file d1ta10356c1.pdf]

## **Electronic Supplementary Information (ESI)**

### **Green self-activation engineering of metal-organic frameworks derived hollow nitrogen-doped carbon spheres towards supercapacitors**

Jinyang Zhang, Dongxu Wu, Qian Zhang, Anning Zhang, Jinfeng Sun, Linrui Hou\*,  
Changzhou Yuan\*

*School of Materials Science and Engineering, University of Jinan, Jinan 250022, P. R.  
China*

E-mail: mse\_houlr@ujn.edu.cn (*Prof. Hou*)

mse\_yuancz@ujn.edu.cn; ayuancz@163.com (*Prof. Yuan*)

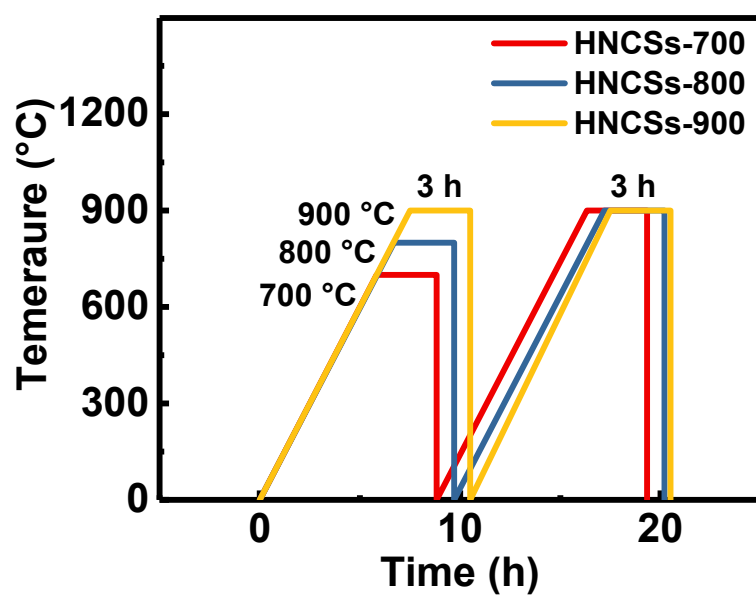

**Fig. S1** Schematic illustration for the two-step calcination process towards synthesis of HNCSSs-700, HNCSSs-800, and HNCSSs-900.

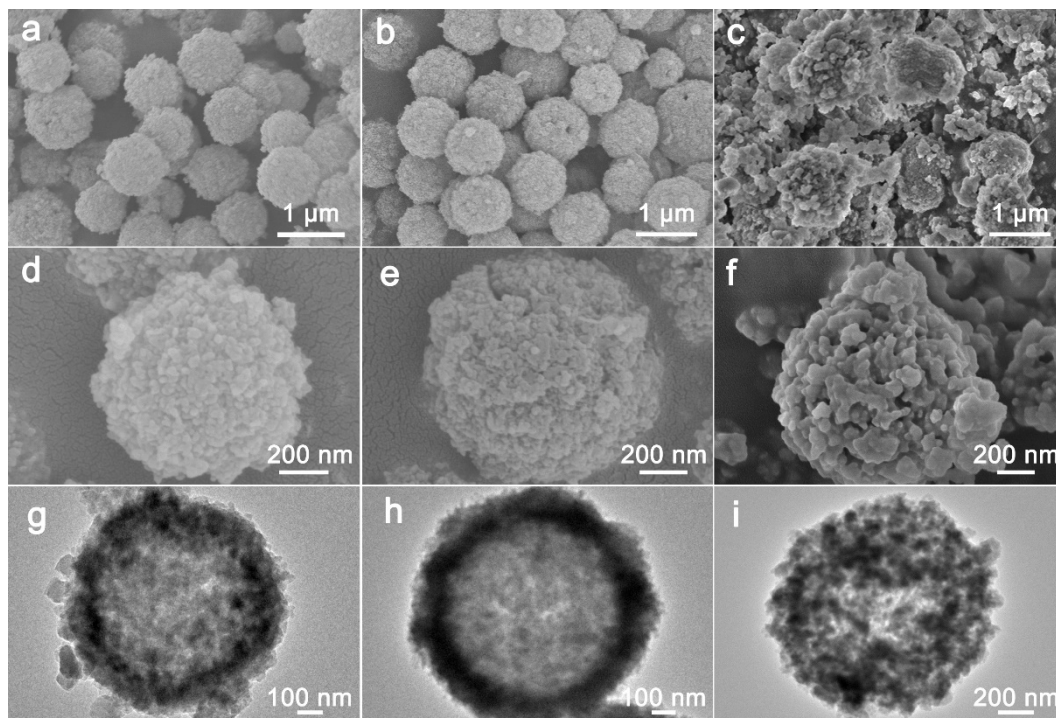

**Fig. S2** (a – f) FESEM and (g – i) TEM images of (a, d, g) HZMSs-2, (b, e, h) HZMSs-4 and (c, f, i) HZMSs-8.

The FESEM images of HZMSs- $x$  ( $x=2, 4, 8$ ) (**Fig. S2**) all also display the hollow microspheres (HMSs). The average diameters of HZMSs-2, HZMSs-4 and HZMSs-8 (**Fig. S2a-f**) are  $\sim 860$ ,  $\sim 1000$  and  $\sim 1190$  nm, respectively, which gradually augment with the increasing temperature. On the contrary, the average shell sizes of HZMSs-2, HZMSs-4 and HZMSs-8 (**Fig. S2g-i**) are  $\sim 170$ ,  $\sim 180$  and  $\sim 460$  nm, suggesting that the higher solvothermal temperature applied can accelerate cavitation process.

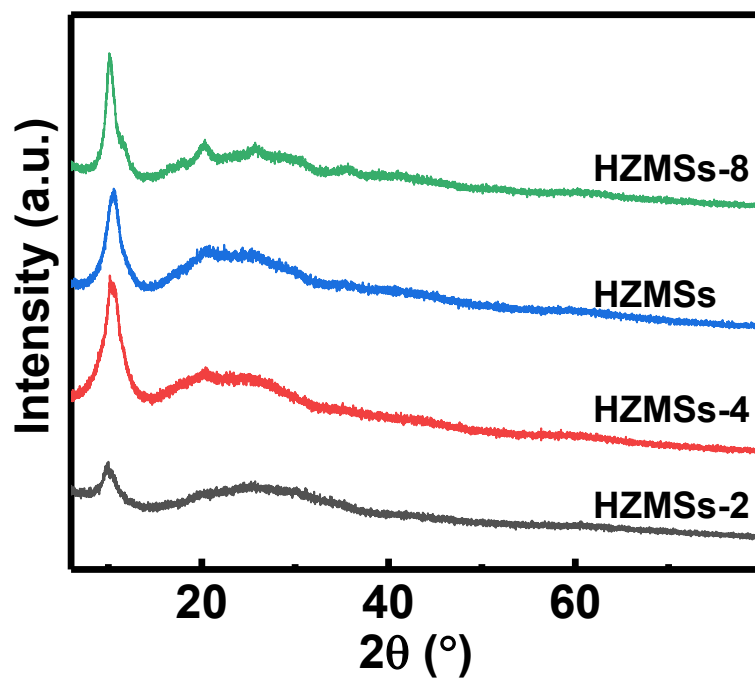

**Fig. S3** XRD patterns of HZMSs, HZMSs-2, HZMSs-4 and HZMSs-8.

The full width at half maximum of the diffraction peak at  $10.7^\circ$  decreases from  $1.4^\circ$  to  $1.1^\circ$ , and the diffraction peaks located at  $2\theta$  range from  $10.7$  to  $21.2^\circ$  become more obvious, suggesting that the crystallization degree of the samples increases with the increasing solvothermal temperature.

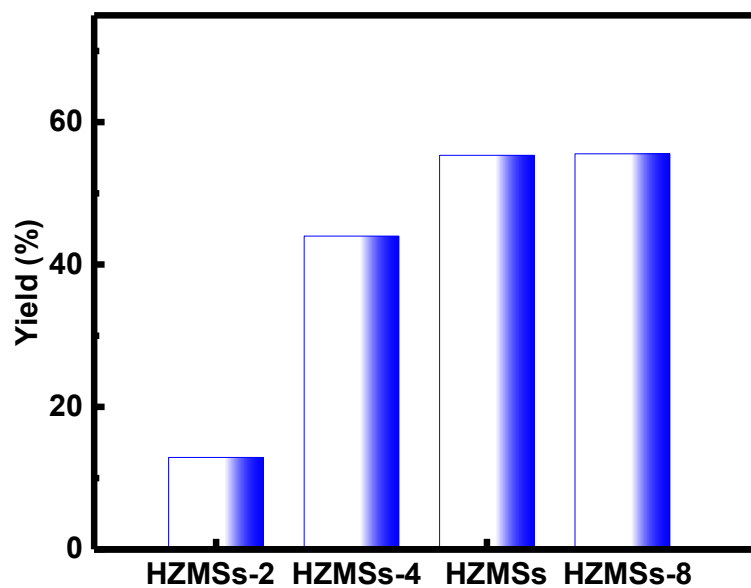

**Fig. S4** Yields of the HZMSs and HZMSs-x (x = 2, 4, 8).

The yields of HZMSs and HZMSs-x (x=2, 4, 8) are calculated based on the content of  $\text{Zn}(\text{NO}_3)_2 \cdot 6\text{H}_2\text{O}$ , corresponding to 55.3%, 12.9%, 44.0%, and 55.3%, respectively (**Fig. S4**). This result indicates that the reaction progress is basically stable when the solvothermal temperature increases to 160 °C.

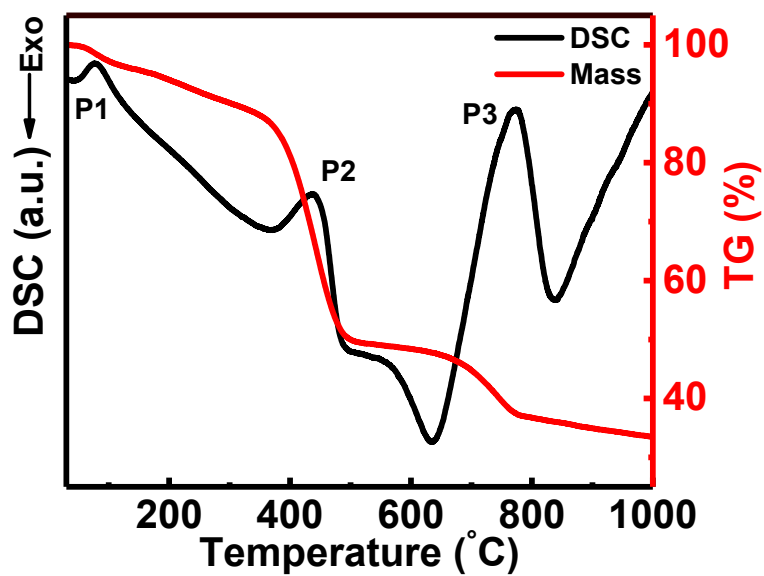

**Fig. S5** DSC and TG curves of HZMSs.

DSC curve displays three broad endothermic peaks corresponding to the loss of adsorbed water (P1, 79 °C), the pyrolysis process (P2, 438 °C) and volatilization of Zn (P3, 773 °C), which accords with the obvious mass losses on the TG curve.

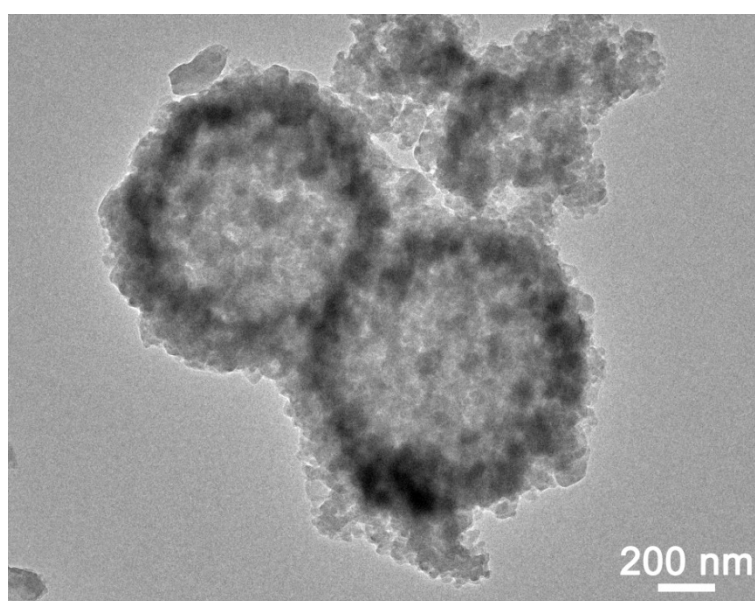

**Fig. S6** TEM image of the product obtained just after solvothermal treatment for 0.5 h at 160 °C.

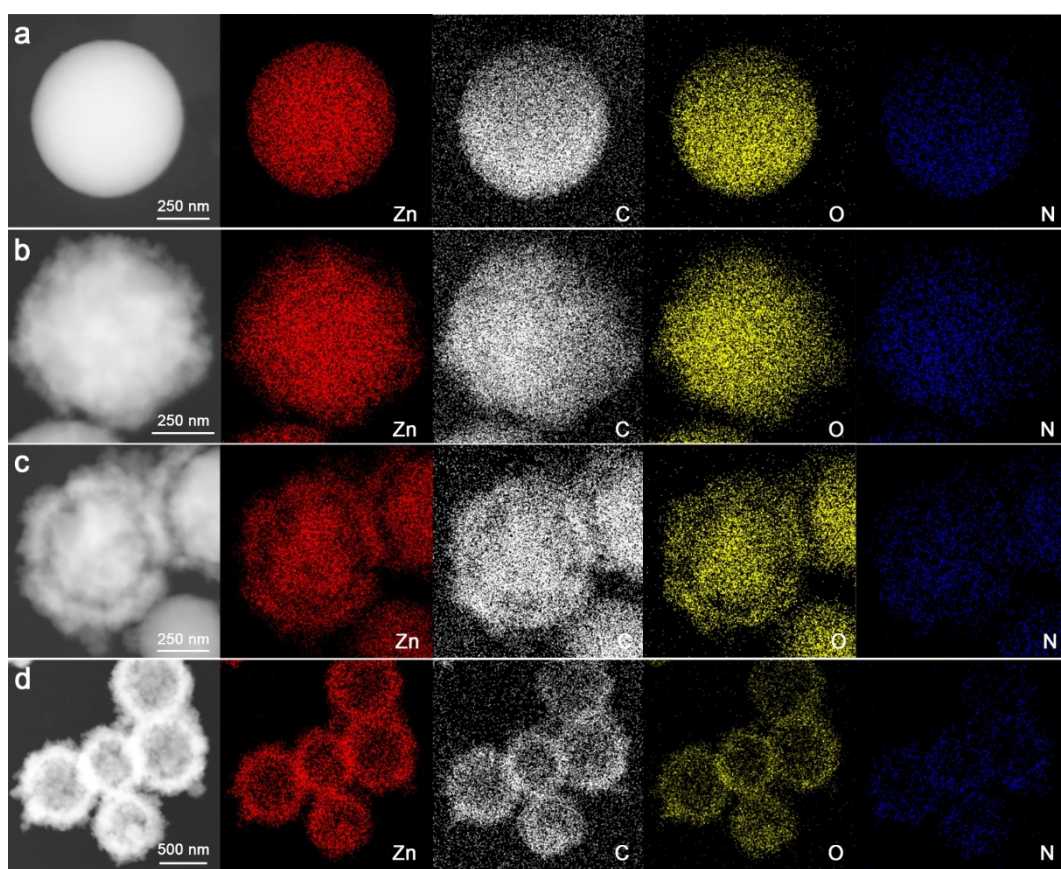

**Fig. S7** STEM images and corresponding element mapping images of Zn, C, O and N for (a) SZMSs, (b) CSZMSs, (e) YSZMSs and (f) HZMSs-1.



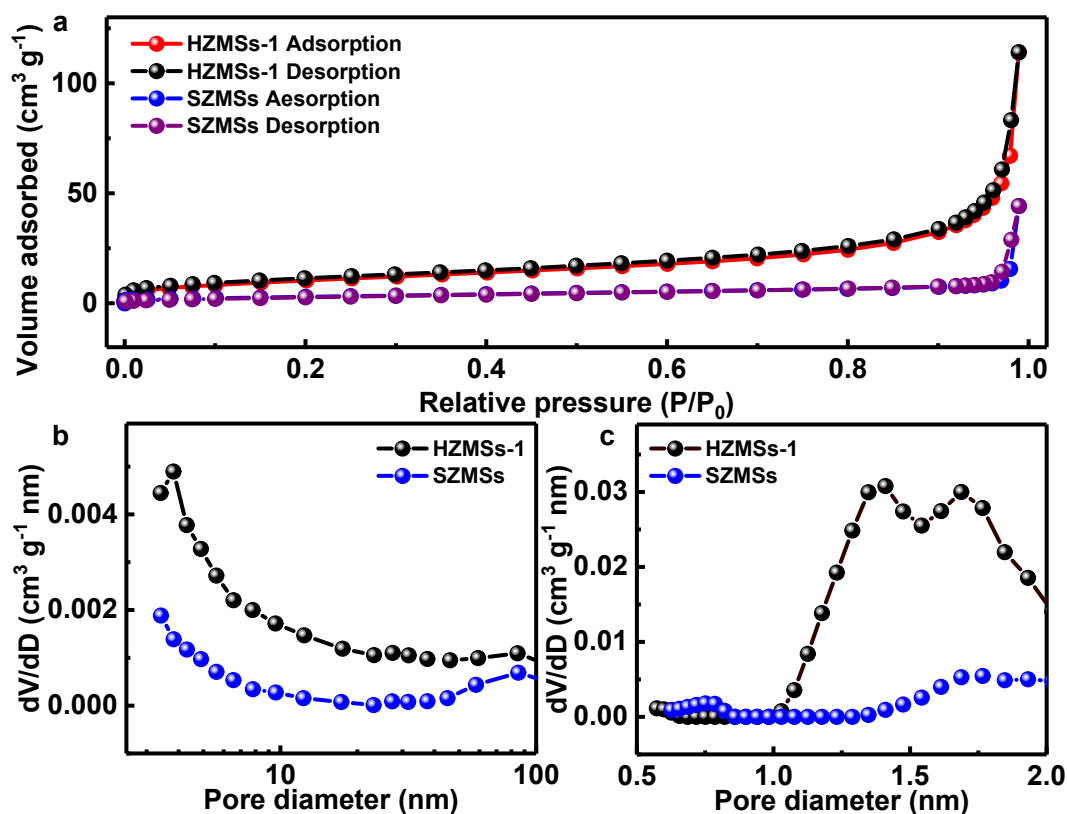

**Fig. S8** (a) N<sub>2</sub> ad-/desorption isotherms, (b) mesopore/macropore and (c) micropore size distribution plots for the SZMSs and HZMSs-1.

The N<sub>2</sub> ad-/desorption isotherms of SZMSs and HZMSs-1 (**Fig. S8a**) are used to quantify the pore structure, which belong type IV isotherms with a H3-type hysteresis loop. Besides, the N<sub>2</sub> ad-/desorption capacity of HZMSs-1 is significantly higher than that of SZMSs. To be specific, the HZMSs-1 has a higher specific surface area (~38.4 m<sup>2</sup> g<sup>-1</sup>) and a larger total pore volume (~0.18 cm<sup>3</sup> g<sup>-1</sup>) than that of SZMSs (~11.0 m<sup>2</sup> g<sup>-1</sup>, ~0.07 cm<sup>3</sup> g<sup>-1</sup>). According the pore size distribution plots (**Fig. S8b, c**), the average pore size of HZMSs-1 is ~18.4 nm, smaller that of the SZMSs (~24.9 nm). Therefore, it is easy to conclude that the solvothermal time plays an important role in promoting the formation of HZMSs-1 with more abundant pores.

**Table S1** The atomic percent of Zn, C, O, N in the SZMSs, CSZMSs, YSZMSs and HZMSs-1

| <b>Sample</b> | <b>Zn</b> | <b>C</b> | <b>O</b> | <b>N</b> | <b>C/Zn</b> |
|---------------|-----------|----------|----------|----------|-------------|
| SZMSs         | 5.2       | 76.7     | 17.0     | 1.1      | 14.75       |
| CSZMSs        | 5.1       | 75.1     | 18.6     | 1.2      | 14.72       |
| YSZMSs        | 4.9       | 74.8     | 19.3     | 1.0      | 15.27       |
| HZMSs-1       | 4.5       | 74.3     | 20.1     | 1.1      | 16.51       |

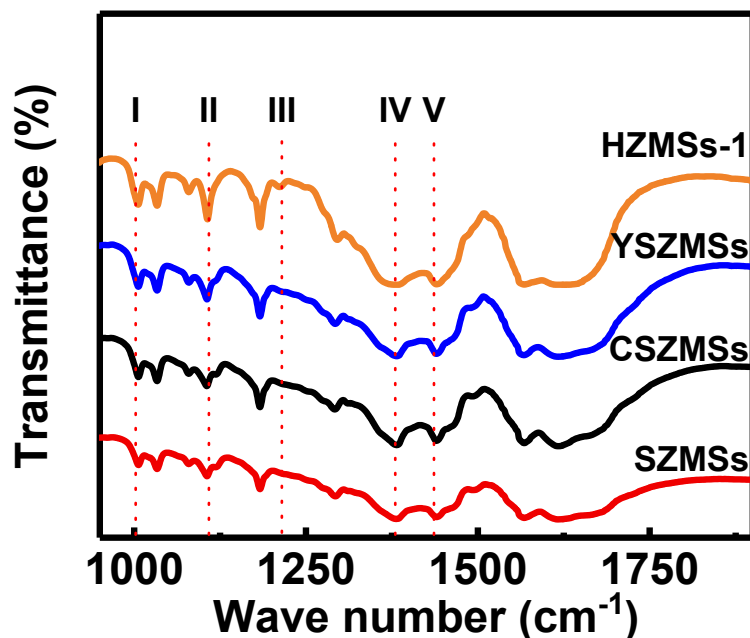

**Fig. S9** FT-IR spectra of the SZMSs, CSZMSs, YSZMSs and HZMSs-1.

The functional groups of organic-ligand are discerned by analyzing the FT-IR spectra (**Fig. S9**). The bands at  $1015\text{ cm}^{-1}$  (I) and  $1095\text{ cm}^{-1}$  (II) are assigned to the para-aromatic C-H.<sup>1-3</sup> Besides, the band (III) at  $1217\text{ cm}^{-1}$  represent the stretching vibrations of the  $\text{NO}_2$  group,<sup>4</sup> which disappears in HZMSs-1. In addition, the band (IV) at  $1370\text{ cm}^{-1}$  is ascribed to stretching vibration of  $\text{-COO}^-$ .<sup>5</sup> Furthermore, the band (V) at  $1415\text{ cm}^{-1}$  is attributed to the stretching vibrations of C-N from DMF.<sup>1,6</sup>

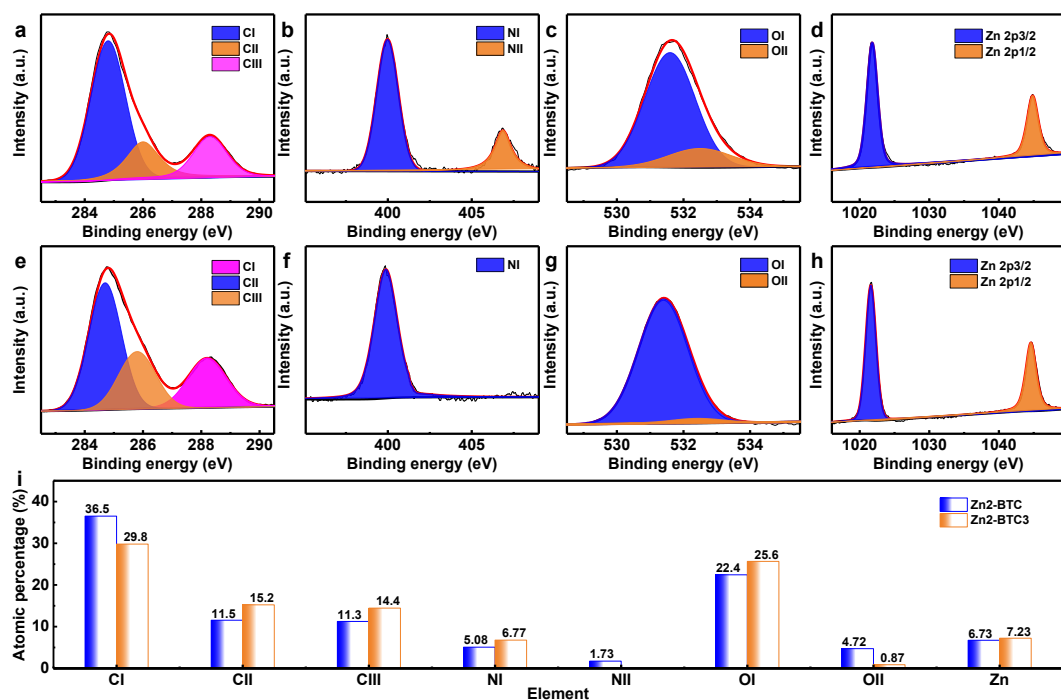

**Fig. S10** High resolution elemental XPS spectra of (a – d) SZMSs and (e – h) HZMSs-1, and (i) atomic percentage of different function group.

In order to further confirm the elemental composition and chemical bond of SZMSs and HZMSs-1 samples, the XPS was conducted, and detailed results are collected in **Fig. S10**. The C 1s (**Fig. S10a, e**) can be subdivided into three peaks at  $\sim 284.8$  (CI),  $\sim 286.0$  (CII) and  $\sim 288.3$  eV (CIII), which are ascribed to the C–C/C=C, C–O/C–N and O–C=O groups.<sup>7</sup> the N 1s spectra (**Fig. S10b, f**) show three peaks at  $\sim 400.0$  (NI) and  $\sim 406.9$  eV (NII), which are attributed to the C–N and N–O groups, respectively.<sup>8</sup> Meanwhile, the high-resolution O 1s spectra (**Fig. S10c, g**) mainly present two oxygen species, that is, O=C/Zn–O (OI,  $\sim 531.6$  eV)<sup>9,10</sup> and O–N/C–OH (OII,  $\sim 532.5$  eV)<sup>11</sup>. As for the Zn 2p spectra (**Fig. S10d, h**), the peaks centered at  $\sim 1021.8$  and  $\sim 1044.9$  eV, confirming the presence of Zn–O.<sup>9</sup> Therefore, the disappearance of N–O functional group suggests that the phase structure has changed between HZMSs-1 and SZMSs.

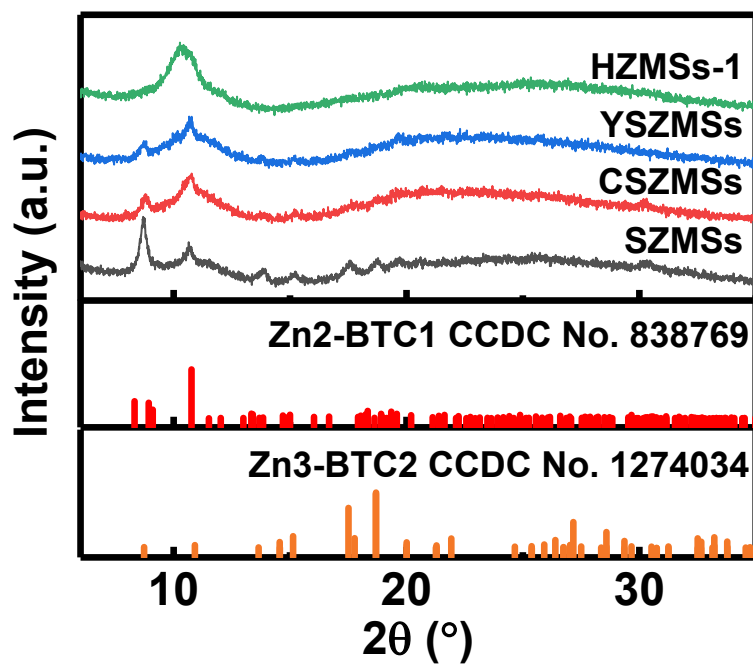

**Fig. S11** XRD patterns of SZMSs, CSZMSs, YSZMSs and HZMSs-1.

Some obvious diffraction peaks appear at 8.7, 10.7, 13.8 and 17.6 ° for SZMSs. However, just one obvious peak appears at 10.7 ° in HZMSs-1. It demonstrates that the Zn<sub>2</sub>-BTC1 (CCDC No. 838769) structure for SZMSs has transformed into Zn<sub>3</sub>-BTC2 (CCDC No. 1274034) structure in HZMSs-1.<sup>12,13</sup>

**Table S2** Summary of  $SSA_{total}$ ,  $SSA_{mic}$ ,  $SSA_{meso}$ , APS and  $V_{total}$  data for some reported carbon nanomaterials

| Sample                   | $SSA_{total}$<br>( $m^2 g^{-1}$ ) | $SSA_{mic}$<br>( $cm^2 g^{-1}$ ) | $SSA_{meso}$<br>( $cm^2 g^{-1}$ ) | APS<br>(nm) | $V_{total}$<br>( $cm^3 g^{-1}$ ) | Refs. |
|--------------------------|-----------------------------------|----------------------------------|-----------------------------------|-------------|----------------------------------|-------|
| CNT-HCS                  | 500.8                             | ~                                | ~                                 | ~           | 0.55                             | 14    |
| HCS-2                    | 670.0                             | ~                                | ~                                 | ~           | 0.44                             | 15    |
| C/KOH-700                | 1113                              | 889                              | 224                               | 1.1-2.4     | 0.68                             | 16    |
| N-HMCSs                  | 750                               | ~                                | ~                                 | ~           | 1.01                             | 17    |
| MnO <sub>2</sub> /HCS-30 | 379                               | 299                              | 71                                | 3.9         | 0.21                             | 18    |
| N-HCS                    | 911                               | 581                              | ~                                 | ~           | 0.92                             | 19    |
| SO-HCS                   | 670                               | ~                                | ~                                 | ~           | 0.91                             | 20    |
| NHCS-E10                 | 306                               | 131                              | ~                                 | ~           | 0.23                             | 21    |
| IPHHCSs                  | 951                               | ~                                | ~                                 | ~           | 0.86                             | 22    |
| NHCSs                    | 112.4                             | ~                                | ~                                 | 1.21        | 0.34                             | 23    |
| N-HMCS-0.1               | 876                               | ~                                | ~                                 | ~           | 1.6                              | 24    |

**Table S3** Summary of XPS data for the HNCSSs-700, HNCSSs-800, and HNCSSs-900 samples

| HNCSSs-700 | Binding energy (eV) | Ratio (at.%) | HNCSSs-800 | Ratio (at.%) | HNCSSs-900 | Ratio (at.%) |
|------------|---------------------|--------------|------------|--------------|------------|--------------|
| C 1s       |                     | 89.1         |            | 91.7         |            | 92.2         |
| C-I        | 284.8               | 50.7         | C-I        | 61.7         | C-I        | 46.8         |
| C-II       | 286.2               | 21.2         | C-II       | 20.9         | C-II       | 16.8         |
| C-III      | 289.0               | 17.1         | C-III      | 9.1          | C-III      | 28.6         |
| N 1s       |                     | 4.5          |            | 4.4          |            | 3.9          |
| N-6        | 398.6               | 2.6          | N-6        | 1.2          | N-6        | 0.6          |
| N-5        | 400.1               | 1.0          | N-5        | 2.7          | N-5        | 2.2          |
| N-Q        | 401.5               | 0.9          | N-Q        | 0.5          | N-Q        | 1.1          |
| O 1s       |                     | 6.4          |            | 3.9          |            | 3.9          |
| O-I        | 531.6               | 4.9          | O-I        | 1.0          | O-I        | 1.4          |
| O-II       | 532.5               | 0.7          | O-II       | 1.2          | O-II       | 1.9          |
| O-III      | 533.6               | 0.7          | O-III      | 1.7          | O-III      | 0.6          |

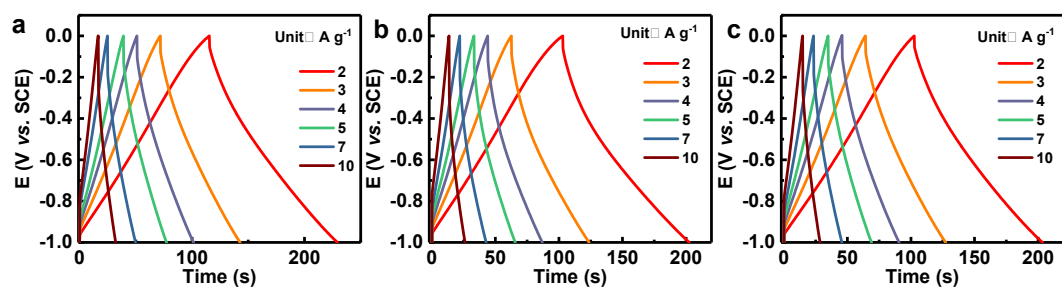

**Fig. S12** GCD plots of (a) HNCSSs-900, (b) HNCSSs-700 and (c) HNCSSs-800 at various current densities from 2 to 10 A g<sup>-1</sup> in the three-electrode systems.



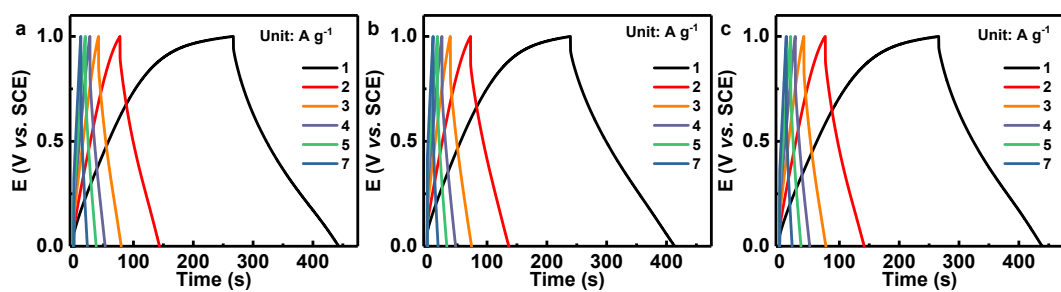

**Fig. S13** GCD curves of the HNCSS-900 in the three-electrode systems for (a) 1 M  $\text{Na}_2\text{SO}_4$ , (b) 1 M  $\text{Li}_2\text{SO}_4$  and (c) 1 M  $\text{K}_2\text{SO}_4$  aqueous electrolyte at various current densities from 1 to 7  $\text{A g}^{-1}$ .

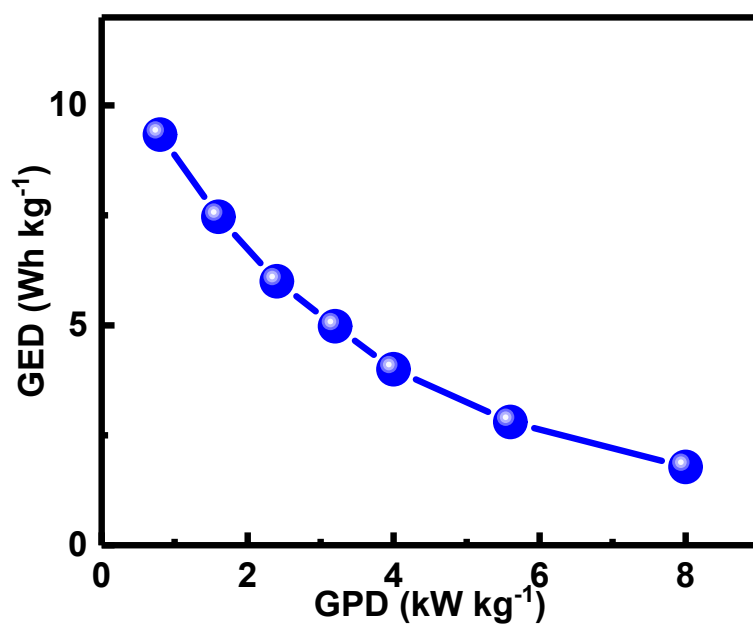

**Fig. S14** Ragone plots of the assembled HNCSs-900//HNCSs-900 cell.

**Table S4** Comparison of GSC between HNCSs-900 and some reported carbon nanomaterials in three-electrode system

| Sample                   | Electrolyte                            | Current density (A g <sup>-1</sup> ) | GSC (F g <sup>-1</sup> ) | Active material loading (mg cm <sup>-2</sup> ) | Refs.           |
|--------------------------|----------------------------------------|--------------------------------------|--------------------------|------------------------------------------------|-----------------|
| <b>HNCSs-900</b>         | <b>6 M KOH</b>                         | <b>1</b>                             | <b>254.6</b>             | <b>5.0</b>                                     | <b>our work</b> |
| <b>HNCSs-900</b>         | <b>1 M H<sub>2</sub>SO<sub>4</sub></b> | <b>1</b>                             | <b>284.4</b>             | <b>5.0</b>                                     | <b>our work</b> |
| CNT-HCS                  | 6 M KOH                                | 0.5                                  | 201.5                    | ~                                              | 14              |
| HCS-2                    | 6 M KOH                                | 0.5                                  | 160.8                    | 2-3                                            | 15              |
| C/KOH-700                | 6 M KOH                                | 1                                    | 295                      | 4-5                                            | 16              |
| HPGS                     | 6 M KOH                                | 1                                    | 227                      | 3                                              | 25              |
| N-HMCSs                  | 6 M KOH                                | 1                                    | 170                      | 7-8                                            | 17              |
| MnO <sub>2</sub> /HCS-30 | 1 M Na <sub>2</sub> SO <sub>4</sub>    | 1                                    | 255                      | 3                                              | 18              |
| N-HCS                    | 6 M KOH                                | 0.5                                  | 173                      | 7-8                                            | 19              |
| SO-HCS                   | 1 M H <sub>2</sub> SO <sub>4</sub>     | 0.1                                  | 210.7                    | ~                                              | 20              |
| NHCS-E10                 | 6 M KOH                                | 0.5                                  | 125                      | ~                                              | 21              |
| IPHHCSs                  | 6 M KOH                                | 1                                    | 295                      | 2.2                                            | 22              |
| NHCSs                    | 6 M KOH                                | 0.5                                  | 263.6                    | 3-6                                            | 23              |
| N-HMCS-0.1               | 6 M KOH                                | 0.5                                  | 307                      | 4-5                                            | 24              |

**Table S5** Comparison of self-discharge rates for supercapacitors using aqueous electrolytes

| Devices                                             | OCVs decay rate (V)    | Leakage current (mA) | Electrolyte                             | Refs.            |
|-----------------------------------------------------|------------------------|----------------------|-----------------------------------------|------------------|
| <b>HNCSS//HNCSS</b>                                 | <b>1.6-1.2 for 5 h</b> | <b>0.011</b>         | <b>1 M Na<sub>2</sub>SO<sub>4</sub></b> | <b>This work</b> |
| NSHPC//NSHPC                                        | 1.0-0.74 for 24 h      | 0.156                | 6 M KOH                                 | 26               |
| TBC-K1.1//TBC-K1.1                                  | 0.9-0.26 for 24 h      | 0.15-0.17            | 1 M H <sub>2</sub> SO <sub>4</sub>      | 27               |
| AC <sub>TS</sub> -1.0//AC <sub>TS</sub> -1.0        | 1.0-0.83 for 1 h       | 0.02                 | 6 M KOH                                 | 28               |
| NiCo <sub>2</sub> O <sub>4</sub> @NC//rGO           | 1.5-1.3 for 24 h       | 0.02                 | 6 M KOH                                 | 29               |
| NiO/DSM-C//DSM-C                                    | 1.4-0.5 for 24 h       | 0.06                 | 6 M KOH                                 | 30               |
| NiS/rGO//IHPC                                       | 1.6-0.75 for 24 h      | 1.7                  | 6 M KOH                                 | 31               |
| NS-132//NS-132                                      | 1.7-0.83 for 22 h      | 106                  | 1 M Li <sub>2</sub> SO <sub>4</sub>     | 32               |
| Asn-5-NaHCO <sub>3</sub> //Asn-5-NaHCO <sub>3</sub> | 1-0.62 for 1 h         | 0.018                | 6 M KOH                                 | 33               |

**Table S6** Comparison of electrochemical properties between HNCSSs-900 and previously reported carbonaceous materials for symmetrical supercapacitor

| Devices                       | Voltage window (V) | Electrolyte                             | GED (Wh kg <sup>-1</sup> ) /GPD (kW kg <sup>-1</sup> ) | Reference       |
|-------------------------------|--------------------|-----------------------------------------|--------------------------------------------------------|-----------------|
| <b>HNCSSs-900//HNCSSs-900</b> | <b>0-1.6 V</b>     | <b>1 M Na<sub>2</sub>SO<sub>4</sub></b> | <b>9.3/0.8</b>                                         | <b>our work</b> |
| CNT-HCS-1.2//CNT-HCS-1.2      | 0-1.6 V            | 1 M Na <sub>2</sub> SO <sub>4</sub>     | ~3/1                                                   | 14              |
| CNT-HCS//CNT-HCS              | 0-1.6 V            | 1 M Na <sub>2</sub> SO <sub>4</sub>     | 11.3/0.13                                              | 14              |
| HCS-2//HCS-2                  | 0-1 V              | 6 M KOH                                 | 6.2/0.025                                              | 15              |
| C/KOH-700//C/KOH-700          | 0-1 V              | 6 M KOH                                 | 8.3/1.1                                                | 16              |
| C-700//C-700                  | 0-1 V              | 6 M KOH                                 | 2.7/0.9                                                | 16              |
| HPGS//HPGS                    | 0-1.2 V            | 6 M KOH                                 | 8.7/0.6                                                | 25              |
| N-HMCS-0.1//N-HMCS-0.1        | 0-0.8 V            | 6 M KOH                                 | 11.2/0.7                                               | 24              |
| N300-F-AC//N300-F-AC          | 0-1 V              | 6 M KOH                                 | 2.54/0.7                                               | 34              |
| L-700//L-700                  | 0-1 V              | 6 M KOH                                 | 8.5/0.1                                                | 35              |
| CPC-5-700//CPC-5-700          | 0-1 V              | 6 M KOH                                 | 8.8/0.1                                                | 36              |
| ACJM//ACJM                    | 0-1.2 V            | 1 M H <sub>2</sub> SO <sub>4</sub>      | 9.9/0.53                                               | 37              |

## References

1. Q. Liu, L. Xie, X. Shi, G. Du, A. M. Asiri, Y. Luo and X. Sun, *Inorg. Chem. Front.*, 2018, **5**, 1570.
2. L. Xu, E. Y. Choi and Y. U. Kwon, *Inorg. Chem. Commun.*, 2008, **11**, 1190.
3. M. Hema, S. Selvasekarapandian, D. Arunkumar, A. Sakunthala and H. Nithya, *J. Non-Cryst. Solids*, 2009, **355**, 84.
4. T. Weingand, S. Kuba, K. Hadjiivanov and H. Knözinger, *J. Catal.*, 2002, **209**, 539.
5. M. R. Johan, K. Si-Wen, N. Hawari and N. A. K. Aznan, *Int. J. Electrochem. Sci.*, 2012, **7**, 4942.
6. A. Paredes-Nunez, D. Lorito, N. Guilhaume, Y. Schuurman and F. Meunier, *Catal. Today*, 2019, **336**, 84.
7. S. J. Zhuo, Y. Y. Guan, H. Li, J. Fang, P. Zhang, J. Y. Du and C. Q. Zhu, *Analyst*, 2019, **144**, 656.
8. X. Zhang, W. H. Hu, L. Pei, S. P. Zhao, C. Y. Zhang and Z. Wang, *High Perform. Polym.*, 2020, **32**, 1.
9. N. K. Gupta, J. Bae, S. Kim and K. S. Kim, *Chemosphere*, 2021, **274**, 129789.
10. J. Y. Zhang, Z. Y. Chen, G. Y. Wang, L. R. Hou and C. Z. Yuan, *Appl. Surf. Sci.*, 2020, **533**, 147511.
11. O. Rosseler, M. Sleiman, V. N. Montesinos, A. Shavorskiy, V. Keller, N. Keller, M. I. Litter, H. Bluhm, M. Salmeron and H. Destailats, *J. Phys. Chem. Lett.*, 2013, **4**, 536.
12. X. R. Hao, X. L. Wang, K. Z. Shao, G. S. Yang, Z. M. Su and G. Yuan, S-22

- Crystengcomm*, 2012, **14**, 5596.
13. O. M. Yaghi, H. Li and T. L. Groy, *J. Am. Chem. Soc.*, 1996, **118**, 9096.
  14. Q. Wang, J. Yan, Y. B. Wang, G. Q. Ning, Z. J. Fan, T. Wei, J. Cheng, M. L. Zhang and X. Y. Jing, *Carbon*, 2013, **52**, 209.
  15. X. D. Yang, Y. L. Li, P. X. Zhang, L. N. Sun, X. Z. Ren and H. W. Mi, *Carbon*, 2020, **157**, 70.
  16. F. Gao, J. Y. Qu, C. Geng, G. H. Shao and M. B. Wu, *J. Mater. Chem. A*, 2016, **4**, 7445.
  17. A. B. Chen, Y. Q. Li, Y. F. Yu, S. F. Ren, Y. Y. Wang, K. C. Xia and S. H. Li, *J. Alloys Compd.*, 2016, **688**, 878.
  18. W. Du, X. N. Wang, J. Zhan, X. Q. Sun, L. T. Kang, F. Y. Jiang, X. Y. Zhang, Q. Shao, M. Y. Dong, H. Liu, V. Murugadoss and Z. H. Guo, *Electrochim. Acta*, 2019, **296**, 907.
  19. M. Liu, Y. F. Yu, B. B. Liu, L. Liu, H. J. Lv and A. B. Chen, *J. Alloys Compd.*, 2018, **768**, 42.
  20. H. R. Wang, H. W. Zhou, M. Gao, Y. A. Zhu, H. T. Liu, L. Gao and M. X. Wu, *Electrochim. Acta*, 2019, **298**, 552.
  21. F. Liu, R. L. Yuan, N. Zhang, C. C. Ke, S. X. Ma, R. L. Zhang and L. Liu, *Appl. Surf. Sci.*, 2018, **437**, 271.
  22. J. Cheng, Y. C. Liu, X. X. Zhang, X. F. Miao, Y. Q. Chen, S. J. Chen, J. H. Lin and Y. N. Zhang, *Chem. Eng. J.*, 2021, **419**, 129649.
  23. D. W. Zhang, S. D. Shen, X. Z. Xiao, D. S. Mao and B. M. Yan, *RSC Adv.*, 2020,

- 10, 26546.
24. J. Du, A. B. Chen, L. Liu, B. Li and Y. Zhang, *Carbon*, 2020, **160**, 265.
  25. C. L. Chen, T. Liang, X. Chen, B. S. Zhang, L. Wang and J. Zhang, *Carbon*, 2018, **132**, 8.
  26. D. Y. Zhang, M. Han, B. Wang, Y. B. Li, L. Y. Lei, K. J. Wang, Y. Wang, L. Zhang and H. X. Feng, *J. Power Sources*, 2017, **358**, 112.
  27. S. Perez-Rodriguez, O. Pinto, M. T. Izquierdo, C. Segura, P. S. Poon, A. Celzard, J. Matos and V. Fierro, *J. Colloid Interface Sci.*, 2021, **601**, 863.
  28. Z. W. Ma, H. Q. Liu and Q. F. Lü, *J. Energy Storage*, 2021, **40**, 102773.
  29. J. Li, Y. Liu, D. Zhan, Y. J. Zou, F. Xu, L. X. Sun, C. L. Xiang and J. Zhang, *J. Energy Storage*, 2021, **39**, 102665.
  30. Z. T. Zhu, F. Gao, Z. H. Zhang, Q. R. Zhuang, H. Yu, Y. Q. Huang, Q. Y. Liu and M. Fu, *J. Colloid Interface Sci.*, 2021, **603**, 157.
  31. D. Y. Zhang, S. Y. Gao, J. W. Zhang, J. R. Wang, W. N. She, K. J. Wang, X. Xia, B. A. Yang and X. X. Meng, *J. Power Sources*, 2021, **514**, 230590.
  32. H. Q. Tan, H. Huang, Z. X. Guan, Y. X. Qian, Y. F. Deng and G. H. Chen, *Electrochim. Acta*, 2020, **354**, 136639.
  33. H. Zhou, Y. M. Zhou, S. M. Wu, L. Li, Y. H. Li, M. X. Guo, Z. C. Qi and C. X. Feng, *J. Alloys Compd.*, 2020, **829**, 154549.
  34. N. F. He, S. Yoo, J. J. Meng, O. Yildiz, P. D. Bradford, S. Park and W. Gao, *Carbon*, 2017, **120**, 304.
  35. F. Y. Liu, Z. X. Wang, H. T. Zhang, L. Jin, X. Chu, B. N. Gu, H. C. Huang and



- W. Q. Yang, *Carbon*, 2019, **149**, 105.
36. G. X. Han, J. B. Jia, Q. R. Liu, G. X. Huang, B. L. Xing, C. X. Zhang and Y. J. Cao, *Carbon*, 2022, **186**, 380.
37. D. Salinas Torres, R. Ruiz Rosas, M. J. Valero Romero, J. Rodríguez Mirasol, T. Cordero, E. Morallón and D. Cazorla Amorós, *J. Power Sources*, 2016, **326**, 641.
